# Supplementary material
Source: PubMed Central journal article supplement (PMC4584189)

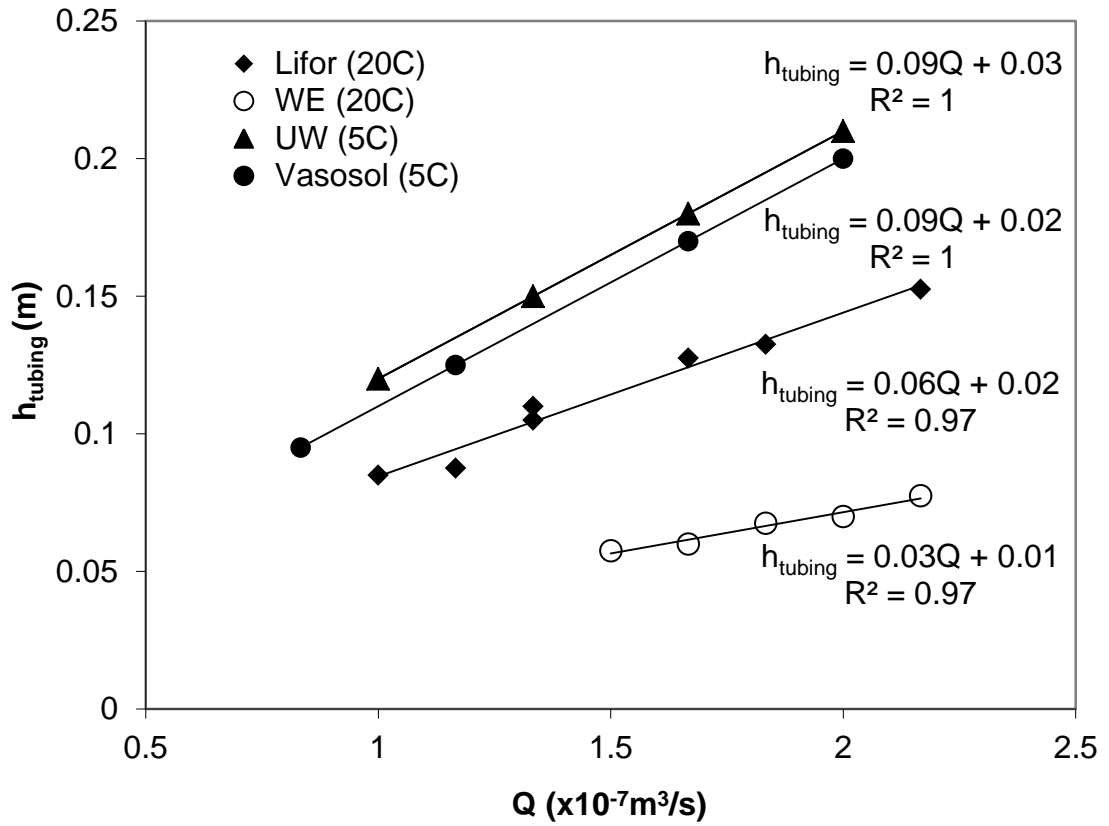

Supplement: NIHMS711477-supplement.pdf [file NIHMS711477-supplement.pdf]
